# Supplementary material
Source: PubMed Central journal article supplement (PMC4156247)
Supplement: pr500437x_si_001.pdf [file pr500437x_si_001.pdf]

**Supplementary Table S1. Node attributes from NEK7 first neighbors network.** Enriched GO Biological Processes (Enriched BP) are depicted with a p-value in parentheses for each protein in the network. Only enriched terms with  $p \leq 0.05$  were considered in the network analysis.

| UniProt Accession | Gene    | Protein                                          | Top Enriched BP              | p-value (Top Enriched BP) | Enriched BP                                                                                                                                                                                                                                                                                                                                                                                                                                                                                                                                                                                                                                                                                                                                                                                                                                                                                                                                                                                                                                                                                                                                                                                                                                                                                          | Cellular Component (GO)                                                         | Node type   |
|-------------------|---------|--------------------------------------------------|------------------------------|---------------------------|------------------------------------------------------------------------------------------------------------------------------------------------------------------------------------------------------------------------------------------------------------------------------------------------------------------------------------------------------------------------------------------------------------------------------------------------------------------------------------------------------------------------------------------------------------------------------------------------------------------------------------------------------------------------------------------------------------------------------------------------------------------------------------------------------------------------------------------------------------------------------------------------------------------------------------------------------------------------------------------------------------------------------------------------------------------------------------------------------------------------------------------------------------------------------------------------------------------------------------------------------------------------------------------------------|---------------------------------------------------------------------------------|-------------|
| Q92974            | ARHGFE2 | Rho guanine nucleotide exchange factor 2         | cell division                | 1,08E-21                  | actin filament organization(0.0233218253872765);apoptotic process(2.55992401287653e-05);cell division(1.07942479554722e-21);cell morphogenesis(0.058401984393526);cellular hyperosmotic response(0.00317344054183859);cellular response to tumor necrosis factor(0.0263488457905523);establishment of mitotic spindle orientation(0.000138173503205002);intracellular protein transport(0.00399808016354407);mitosis(0.000102781026324568);negative regulation of apoptotic process(0.000648052387978584);negative regulation of microtubule depolymerization(2.66604448071471e-06);negative regulation of necrotic cell death(0.00238194179822328);negative regulation of neurogenesis(0.00711238456606543);neurotrophin TRK receptor signaling pathway(2.07923260218922e-06);positive regulation of NF-kappaB transcription factor activity(0.00170565228819669);regulation of cell proliferation(0.0756261506035337);regulation of Rho protein signal transduction(0.128558427410656);small GTPase mediated signal transduction(0.000947140854281652)                                                                                                                                                                                                                                             | cytosol;golgi apparatus;cytoplasm;plasma membrane                               | IP-LC-MS/MS |
| Q7Z460            | CLASP1  | CLIP-associating protein 1                       | cell division                | 1,08E-21                  | axon guidance(3.66211750441785e-08);cell division(1.07942479554722e-21);establishment of spindle orientation(0.00079522295738861);exit from mitosis(0.00238194179822328);G2/M transition of mitotic cell cycle(2.22012761453102e-07);microtubule anchoring(0.000151369603879024);microtubule bundle formation(8.00153938715998e-10);microtubule nucleation(1.85532748848651e-05);microtubule organizing center organization(9.31947268647938e-07);mitotic prometaphase(1.2831663561912e-12);negative regulation of microtubule depolymerization(2.66604448071471e-06)                                                                                                                                                                                                                                                                                                                                                                                                                                                                                                                                                                                                                                                                                                                                | cytoplasm;cytosol;golgi apparatus                                               | IP-LC-MS/MS |
| O75122            | CLASP2  | CLIP-associating protein 2                       | cell division                | 1,08E-21                  | axon guidance(3.66211750441785e-08);cell division(1.07942479554722e-21);establishment or maintenance of cell polarity(0.000355409196739185);microtubule anchoring(0.000151369603879024);microtubule nucleation(1.85532748848651e-05);microtubule organizing center organization(9.31947268647938e-07);mitotic prometaphase(1.2831663561912e-12);negative regulation of microtubule depolymerization(2.66604448071471e-06)                                                                                                                                                                                                                                                                                                                                                                                                                                                                                                                                                                                                                                                                                                                                                                                                                                                                            | cytoplasm;cytosol;golgi apparatus;microtubule organising centre;plasma membrane | IP-LC-MS/MS |
| Q15021            | NCAPD2  | Condensin complex subunit 1                      | cell division                | 1,08E-21                  | cell division(1.07942479554722e-21);mitotic chromosome condensation(1.00132277711672e-11)                                                                                                                                                                                                                                                                                                                                                                                                                                                                                                                                                                                                                                                                                                                                                                                                                                                                                                                                                                                                                                                                                                                                                                                                            | cytoplasm;nucleus                                                               | IP-LC-MS/MS |
| P42695            | NCAPD3  | Condensin-2 complex subunit D3                   | cell division                | 1,08E-21                  | cell division(1.07942479554722e-21);mitotic chromosome condensation(1.00132277711672e-11)                                                                                                                                                                                                                                                                                                                                                                                                                                                                                                                                                                                                                                                                                                                                                                                                                                                                                                                                                                                                                                                                                                                                                                                                            | cytoplasm;nucleus                                                               | IP-LC-MS/MS |
| Q9BPX3            | NCAPG   | Condensin complex subunit 3                      | cell division                | 1,08E-21                  | cell division(1.07942479554722e-21);mitotic chromosome condensation(1.00132277711672e-11)                                                                                                                                                                                                                                                                                                                                                                                                                                                                                                                                                                                                                                                                                                                                                                                                                                                                                                                                                                                                                                                                                                                                                                                                            | cytoplasm;centrosome;nucleus                                                    | IP-LC-MS/MS |
| Q8TD19            | NEK9    | Serine/threonine-protein kinase Nek9             | cell division                | 1,08E-21                  | cell division(1.07942479554722e-21);mitosis(0.000102781026324568)                                                                                                                                                                                                                                                                                                                                                                                                                                                                                                                                                                                                                                                                                                                                                                                                                                                                                                                                                                                                                                                                                                                                                                                                                                    | mitochondrion;nucleus                                                           | Y2H         |
| Q14980            | NUMA1   | Nuclear mitotic apparatus protein 1              | cell division                | 1,08E-21                  | cell division(1.07942479554722e-21);establishment of mitotic spindle orientation(0.000138173503205002);G2/M transition of mitotic cell cycle(2.22012761453102e-07);lung epithelial cell differentiation(0.0160554148239213);mitotic anaphase(0.0067198784533802);nucleus organization(0.00277784607759494)                                                                                                                                                                                                                                                                                                                                                                                                                                                                                                                                                                                                                                                                                                                                                                                                                                                                                                                                                                                           | cytoplasm;cytosol;nucleus                                                       | IP-LC-MS/MS |
| Q9P258            | RCC2    | Protein RCC2                                     | cell division                | 1,08E-21                  | cell division(1.07942479554722e-21);mitotic prometaphase(1.2831663561912e-12)                                                                                                                                                                                                                                                                                                                                                                                                                                                                                                                                                                                                                                                                                                                                                                                                                                                                                                                                                                                                                                                                                                                                                                                                                        | cytosol;cytoplasm;nucleus                                                       | IP-LC-MS/MS |
| Q14683            | SMC1A   | Structural maintenance of chromosomes protein 1A | cell division                | 1,08E-21                  | cell cycle checkpoint(0.0187452092674526);cell division(1.07942479554722e-21);chromosome condensation(0.00946096245045438);DNA recombination(1.85397813404995e-05);DNA repair(1.80749553775437e-06);meiosis(0.000179532761252513);metaphase/anaphase transition of mitotic cell cycle(1.19803323460096e-07);mitotic prometaphase(1.2831663561912e-12);mitotic sister chromatid cohesion(0.00238194179822328);mitotic spindle organization(1.85532748848651e-05);mRNA splicing, via spliceosome(0.0629477854388076);negative regulation of DNA endoreplication(1.55264927967749e-06);response to radiation(0.0137380308757676);signal transduction in response to DNA damage(0.00475272381511444);stem cell maintenance(0.00051277552598452)                                                                                                                                                                                                                                                                                                                                                                                                                                                                                                                                                          | cytoplasm;nucleus                                                               | IP-LC-MS/MS |
| O95347            | SMC2    | Structural maintenance of chromosomes protein 2  | cell division                | 1,08E-21                  | cell division(1.07942479554722e-21);DNA recombination(1.85397813404995e-05);DNA repair(1.80749553775437e-06);kinetochore organization(8.51992342452596e-06);meiotic chromosome condensation(8.51992342452596e-06);meiotic chromosome segregation(1.02199837680929e-05);mitotic chromosome condensation(1.00132277711672e-11);sister chromatid cohesion(7.88135944206877e-08)                                                                                                                                                                                                                                                                                                                                                                                                                                                                                                                                                                                                                                                                                                                                                                                                                                                                                                                         | cytoplasm;nucleus                                                               | IP-LC-MS/MS |
| Q9UQE7            | SMC3    | Structural maintenance of chromosomes protein 3  | cell division                | 1,08E-21                  | cell division(1.07942479554722e-21);DNA repair(1.80749553775437e-06);meiosis(0.000179532761252513);metaphase/anaphase transition of mitotic cell cycle(1.19803323460096e-07);mitotic prometaphase(1.2831663561912e-12);mitotic spindle organization(1.85532748848651e-05);negative regulation of DNA endoreplication(1.55264927967749e-06);signal transduction(0.326898276536456);sister chromatid cohesion(7.88135944206877e-08);stem cell maintenance(0.00051277552598452)                                                                                                                                                                                                                                                                                                                                                                                                                                                                                                                                                                                                                                                                                                                                                                                                                         | extracellular;cytoplasm;nucleus                                                 | IP-LC-MS/MS |
| Q9NTJ3            | SMC4    | Structural maintenance of chromosomes protein 4  | cell division                | 1,08E-21                  | chromosome condensation(8.51992342452596e-06);meiotic chromosome segregation(1.02199837680929e-05);mitotic chromosome condensation(1.00132277711672e-11);sister chromatid cohesion(7.88135944206877e-08)                                                                                                                                                                                                                                                                                                                                                                                                                                                                                                                                                                                                                                                                                                                                                                                                                                                                                                                                                                                                                                                                                             | cytoplasm;nucleus                                                               | IP-LC-MS/MS |
| P53350            | PLK1    | Serine/threonine-protein kinase PLK1             | mitotic prometaphase         | 1,28E-12                  | activation of mitotic anaphase-promoting complex activity(0.00198572752518753);anaphase-promoting complex-dependent proteasomal ubiquitin-dependent protein catabolic process(0.000642152144451947);cell proliferation(0.0149821972259697);centrosome organization(0.0198934362348523);cytokinesis(8.8559460231763e-08);G2 DNA damage checkpoint(7.14810798681335e-05);G2/M transition of mitotic cell cycle(2.22012761453102e-07);microtubule bundle formation(8.00153938715998e-10);metaphase/anaphase transition of mitotic cell cycle(1.19803323460096e-07);mitotic prometaphase(1.2831663561912e-12);mitotic prophase(0.00079522295738861);negative regulation of apoptotic process(0.000648052387978584);negative regulation of cyclin-dependent protein serine/threonine kinase activity(0.0117984957519671);negative regulation of transcription from RNA polymerase II promoter(0.0622476215191769);peptidyl-serine phosphorylation(0.000683693601291364);positive regulation of peptidyl-threonine phosphorylation(0.00593394194615603);protein destabilization(0.0114096722320805);protein localization to chromatin(0.00119236828353075);protein ubiquitination(0.143478504338707);regulation of mitotic anaphase(0.00079522295738861);regulation of protein binding(0.0137380308757676) | centrosome;cytosol;nucleus;cytoplasm                                            | IP-LC-MS/MS |
| O95235            | KIF20A  | Kinesin-like protein KIF20A                      | microtubule bundle formation | 8,00E-10                  | cytokinesis(8.8559460231763e-08);M phase of mitotic cell cycle(0.011409762320805);microtubule bundle formation(8.00153938715998e-10);microtubule-based movement(0.116925819669428);protein transport(0.00222028449423476);vesicle-mediated transport(0.148213049014623)                                                                                                                                                                                                                                                                                                                                                                                                                                                                                                                                                                                                                                                                                                                                                                                                                                                                                                                                                                                                                              | golgi apparatus;cytoplasm;nucleus                                               | IP-LC-MS/MS |
| P11137            | MAP2    | Microtubule-associated protein 2                 | microtubule bundle formation | 8,00E-10                  | axonogenesis(0.0625998053367013);cellular response to organic substance(0.0168254438826213);central nervous system neuron development(0.0106311072858504);dendrite morphogenesis(0.0289817832346469);microtubule bundle formation(8.00153938715998e-10);peptidyl-threonine phosphorylation(0.0164405811645699)                                                                                                                                                                                                                                                                                                                                                                                                                                                                                                                                                                                                                                                                                                                                                                                                                                                                                                                                                                                       | cytoplasm;nucleus                                                               | IP-LC-MS/MS |

|        |        |                                          |                                                                           |          |                                                                                                                                                                                                                                                                                                                                                                                                                                                                                                                                                                                                                                                                                                                                                                                                                                                                                                                                                                                                                                                                                                                                                                                                                                                                                                                                                                                                                                                                                                                                                                                                                                                                                                                                                                                                                                                                                                                                                                                                                                                                                                                                                                                                                                                                                                                                                                                                                                                                                                                                                                                                                                                                                                                                                                                                                                                                                                                                                                                                                                                                                                                                                                                                                                                                                                                                                                                                                                                                                                                                                                     |                                                                                 |                          |
|--------|--------|------------------------------------------|---------------------------------------------------------------------------|----------|---------------------------------------------------------------------------------------------------------------------------------------------------------------------------------------------------------------------------------------------------------------------------------------------------------------------------------------------------------------------------------------------------------------------------------------------------------------------------------------------------------------------------------------------------------------------------------------------------------------------------------------------------------------------------------------------------------------------------------------------------------------------------------------------------------------------------------------------------------------------------------------------------------------------------------------------------------------------------------------------------------------------------------------------------------------------------------------------------------------------------------------------------------------------------------------------------------------------------------------------------------------------------------------------------------------------------------------------------------------------------------------------------------------------------------------------------------------------------------------------------------------------------------------------------------------------------------------------------------------------------------------------------------------------------------------------------------------------------------------------------------------------------------------------------------------------------------------------------------------------------------------------------------------------------------------------------------------------------------------------------------------------------------------------------------------------------------------------------------------------------------------------------------------------------------------------------------------------------------------------------------------------------------------------------------------------------------------------------------------------------------------------------------------------------------------------------------------------------------------------------------------------------------------------------------------------------------------------------------------------------------------------------------------------------------------------------------------------------------------------------------------------------------------------------------------------------------------------------------------------------------------------------------------------------------------------------------------------------------------------------------------------------------------------------------------------------------------------------------------------------------------------------------------------------------------------------------------------------------------------------------------------------------------------------------------------------------------------------------------------------------------------------------------------------------------------------------------------------------------------------------------------------------------------------------------------|---------------------------------------------------------------------------------|--------------------------|
| O95782 | AP2A1  | AP-2 complex subunit alpha-1             | negative regulation of epidermal growth factor receptor signaling pathway | 1,47E-09 | antigen processing and presentation of exogenous peptide antigen via MHC class II(0.000975662001904681);axon guidance(3.66211750441785e-08);endocytosis(0.0849689645098441);epidermal growth factor receptor signaling pathway(3.98158961250694e-07);Golgi to endosome transport(0.00475272381511444);intracellular protein transport(0.00399808016354407);negative regulation of epidermal growth factor receptor signaling pathway(1.4668656642032e-09);neurotrophin TRK receptor signaling pathway(2.07923260218922e-06);regulation of defense response to virus by virus(1.93618738873914e-07);synaptic transmission(0.010157398333458);viral process(2.18153183719986e-05)                                                                                                                                                                                                                                                                                                                                                                                                                                                                                                                                                                                                                                                                                                                                                                                                                                                                                                                                                                                                                                                                                                                                                                                                                                                                                                                                                                                                                                                                                                                                                                                                                                                                                                                                                                                                                                                                                                                                                                                                                                                                                                                                                                                                                                                                                                                                                                                                                                                                                                                                                                                                                                                                                                                                                                                                                                                                                     | plasma membrane;golgi apparatus;cytosol                                         | IP-LC-MS/MS              |
| P63010 | AP2B1  | AP-2 complex subunit beta                | negative regulation of epidermal growth factor receptor signaling pathway | 1,47E-09 | antigen processing and presentation of exogenous peptide antigen via MHC class II(0.000975662001904681);axon guidance(3.66211750441785e-08);clathrin coat assembly(0.0125752257676977);epidermal growth factor receptor signaling pathway(3.98158961250694e-07);intracellular protein transport(0.00399808016354407);negative regulation of epidermal growth factor receptor signaling pathway(1.4668656642032e-09);neurotrophin TRK receptor signaling pathway(2.07923260218922e-06);regulation of defense response to virus by virus(1.93618738873914e-07);synaptic transmission(0.010157398333458);viral process(2.18153183719986e-05)                                                                                                                                                                                                                                                                                                                                                                                                                                                                                                                                                                                                                                                                                                                                                                                                                                                                                                                                                                                                                                                                                                                                                                                                                                                                                                                                                                                                                                                                                                                                                                                                                                                                                                                                                                                                                                                                                                                                                                                                                                                                                                                                                                                                                                                                                                                                                                                                                                                                                                                                                                                                                                                                                                                                                                                                                                                                                                                           | cytosol;plasma membrane                                                         | IP-LC-MS/MS              |
| P60953 | CDC42  | Cell division control protein 42 homolog | negative regulation of epidermal growth factor receptor signaling pathway | 1,47E-09 | actin cytoskeleton organization(0.113880769962122);actin filament branching(0.0015892030798619);actin filament bundle assembly(0.0360549205440896);adherens junction organization(0.000186941490812127);axon guidance(3.66211750441785e-08);blood coagulation(0.000380021218663613);canonical Wnt receptor signaling pathway(0.0477277613096136);cardiac conduction system development(0.00396370073863742);cellular protein localization(0.0342039283272441);epidermal growth factor receptor signaling pathway(3.98158961250694e-07);epithelial cell-cell adhesion(0.00514677187861983);epithelial-mesenchymal cell signaling(0.00475272381511444);establishment of Golgi localization(0.0027784607759494);establishment or maintenance of apical/basal cell polarity(0.00396370073863742);establishment or maintenance of cell polarity(0.000355409196739185);filopodium assembly(0.0244592068650961);Golgi organization(0.0214201776692546);hair follicle morphogenesis(0.0202755742288883);hair follicle placode formation(0.00907030082044425);heart contraction(0.00828805647114202);keratinization(0.0210389447716819);keratinocyte development(0.00317344054183859);macrophage differentiation(0.00750458282164871);multicellular organism growth(0.0541632394554003);muscle cell differentiation(0.0202755742288883);negative regulation of epidermal growth factor receptor signaling pathway(1.4668656642032e-09);negative regulation of gene expression(0.0422933273540914);negative regulation of protein complex assembly(0.00396370073863742);neuron fate determination(0.0027784607759494);nuclear migration(0.00671987845333802);organelle transport along microtubule(0.00317344054183859);positive regulation of DNA replication(0.0237012527950014);positive regulation of gene expression(0.00295023504379598);positive regulation of hair follicle cell proliferation(0.00198572752518753);positive regulation of intracellular protein transport(0.0027784607759494);positive regulation of JNK cascade(0.000550113489024593);positive regulation of metalloenzyme activity(0.00396370073863742);positive regulation of muscle cell differentiation(0.00985131728675537);positive regulation of neuron apoptotic process(0.0408330827936499);positive regulation of peptidyl-serine phosphorylation(0.0263488457905523);positive regulation of phosphatidylinositol 3-kinase activity(0.0141250226389181);positive regulation of pseudopodium assembly(0.00396370073863742);positive regulation of synapse structural plasticity(0.00356872536940053);regulation of attachment of spindle microtubules to kinetochore(0.00750458282164871);regulation of filopodium assembly(0.0027784607759494);regulation of mitosis(5.40396186519786e-05);regulation of protein catabolic process(0.0218011092166748);regulation of protein heterodimerization activity(0.00514677187861983);regulation of protein kinase activity(0.00985131728675537);regulation of protein stability(0.0148980923117477);regulation of small GTPase mediated signal transduction(0.110809982525537);small GTPase mediated signal transduction(0.000947140854281652);sprouting angiogenesis(0.014511709725624);submandibular salivary gland formation(0.00317344054183859);T cell costimulation(0.0371619790485928)                                                                                                                                                                                                                                                    | cytosol;golgi apparatus;microtubule organising centre;plasma membrane;cytoplasm | IP-LC-MS/MS              |
| P62979 | RPS27A | Ubiquitin-40S ribosomal protein S27a     | negative regulation of epidermal growth factor receptor signaling pathway | 1,47E-09 | activation of MAPK activity(0.0629477854388076);anaphase-promoting complex-dependent proteasomal ubiquitin-dependent protein catabolic process(0.000642152144451947);antigen processing and presentation of exogenous peptide antigen via MHC class I, TAP-dependent(0.0011491052785394);apoptotic process(2.55992401287653e-05);cellular membrane organization(0.0312269670665579);cytokine-mediated signaling pathway(0.0813241556455092);DNA damage response, signal transduction by p53 class mediator resulting in cell cycle arrest(0.0349452104460717);DNA repair(1.80749553775437e-06);egress of virus within host cell(0.00435836682781625);endosomal transport(0.027102606500391);epidermal growth factor receptor signaling pathway(3.98158961250694e-07);fibroblast growth factor receptor signaling pathway(0.0488068215511484);G1 phase of mitotic cell cycle(0.000119490098783552);G1/S transition of mitotic cell cycle(0.00226378704275956);I-kappaB kinase/NF-kappaB cascade(0.0191282539288057);innate immune response(0.185361105329795);JNK cascade(0.0304797616903373);M/G1 transition of mitotic cell cycle(0.0304797616903373);MyD88-dependent toll-like receptor signaling pathway(0.0677899665355223);negative regulation of epidermal growth factor receptor signaling pathway(1.4668656642032e-09);negative regulation of transcription from RNA polymerase II promoter(0.0622476215191769);negative regulation of transforming growth factor beta receptor signaling pathway(0.0408330827936499);negative regulation of type I interferon production(0.0129631326162411);negative regulation of ubiquitin-protein ligase activity involved in mitotic cell cycle(0.0244592068650961);neurotrophin TRK receptor signaling pathway(2.07923260218922e-06);Notch receptor processing(0.00985131728675537);Notch signaling pathway(0.0660669339128394);nuclear-transcribed mRNA catabolic process, nonsense-mediated decay(1.52489109676196e-05);nucleotide-binding oligomerization domain containing signaling pathway(0.00946096245045438);positive regulation of I-kappaB kinase/NF-kappaB cascade(0.000104124416778128);positive regulation of NF-kappaB transcription factor activity(0.00170565228819669);positive regulation of transcription from RNA polymerase II promoter(0.0927501700886529);positive regulation of ubiquitin-protein ligase activity involved in mitotic cell cycle(0.027102606500391);protein polyubiquitination(0.0455618279243012);regulation of apoptotic process(0.114796980424188);regulation of transcription from RNA polymerase II promoter in response to hypoxia(0.00867933221970861);S phase of mitotic cell cycle(0.00113115411855978);SRP-dependent cotranslational protein targeting to membrane(2.22649669967908e-05);T cell receptor signaling pathway(0.0548725510465976);Toll signaling pathway(0.0371619790485928);toll-like receptor 1 signaling pathway(0.0308535128892836);toll-like receptor 2 signaling pathway(0.0304797616903373);toll-like receptor 3 signaling pathway(0.0301057132976248);toll-like receptor 4 signaling pathway(0.0378985472205216);transcription initiation from RNA polymerase II promoter(0.00378158476124163);transforming growth factor beta receptor signaling pathway(0.0839781930192875);translational elongation(1.01608240187251e-05);translational initiation(1.13865950608156e-05);translational termination(5.1891407422798e-06);TRIF-dependent toll-like receptor signaling pathway(0.0259715168833515);viral transcription(5.12859789334388e-06) | cytosol;endosome;nucleus;plasma membrane                                        | IP-LC-MS/MS and Y2H      |
| P63261 | ACTG1  | Actin, cytoplasmic 2                     | axon guidance                                                             | 3,66E-08 | adherens junction organization(0.000186941490812127);axon guidance(3.66211750441785e-08);blood coagulation(0.000380021218663613);cell junction assembly(0.0172100031534075);cellular component movement(0.0397348296846733);sarcomere organization(0.0248377338747033)                                                                                                                                                                                                                                                                                                                                                                                                                                                                                                                                                                                                                                                                                                                                                                                                                                                                                                                                                                                                                                                                                                                                                                                                                                                                                                                                                                                                                                                                                                                                                                                                                                                                                                                                                                                                                                                                                                                                                                                                                                                                                                                                                                                                                                                                                                                                                                                                                                                                                                                                                                                                                                                                                                                                                                                                                                                                                                                                                                                                                                                                                                                                                                                                                                                                                              | cytoplasm;cytosol                                                               | Y2H                      |
| Q9HC98 | NEK6   | Serine/threonine-protein kinase Nek6     | cytokinesis                                                               | 8,86E-08 | apoptotic process(2.55992401287653e-05);chromosome segregation(0.0278551722240494);cytokinesis(8.8559460231763e-08);G2 DNA damage checkpoint(7.14810798681335e-05);mitosis(0.000102781026324568);peptidyl-serine phosphorylation(0.000683693601291364);positive regulation of I-kappaB kinase/NF-kappaB cascade(0.000104124416778128);protein autophosphorylation(0.00553059148756651);regulation of cellular senescence(0.00198572752518753);regulation of mitotic metaphase/anaphase transition(0.0027784607759494);spindle assembly(0.000278090461892406)                                                                                                                                                                                                                                                                                                                                                                                                                                                                                                                                                                                                                                                                                                                                                                                                                                                                                                                                                                                                                                                                                                                                                                                                                                                                                                                                                                                                                                                                                                                                                                                                                                                                                                                                                                                                                                                                                                                                                                                                                                                                                                                                                                                                                                                                                                                                                                                                                                                                                                                                                                                                                                                                                                                                                                                                                                                                                                                                                                                                        | cytoplasm;microtubule organising centre;nucleus                                 | INTERACTOR FROM DATABASE |
| Q8TDX7 | NEK7   | Serine/threonine-protein kinase Nek7     | cytokinesis                                                               | 8,86E-08 | cytokinesis(8.8559460231763e-08);regulation of mitotic cell cycle(0.0110205428022322);spindle assembly(0.000278090461892406)                                                                                                                                                                                                                                                                                                                                                                                                                                                                                                                                                                                                                                                                                                                                                                                                                                                                                                                                                                                                                                                                                                                                                                                                                                                                                                                                                                                                                                                                                                                                                                                                                                                                                                                                                                                                                                                                                                                                                                                                                                                                                                                                                                                                                                                                                                                                                                                                                                                                                                                                                                                                                                                                                                                                                                                                                                                                                                                                                                                                                                                                                                                                                                                                                                                                                                                                                                                                                                        | cytoplasm;microtubule organising centre;nucleus                                 | BAIT                     |
| Q9NYV4 | CDK12  | Cyclin-dependent kinase 12               | phosphorylation of RNA polymerase II C-terminal domain                    | 1,55E-07 | cell cycle(0.00072258391376332);mRNA processing(0.0846389790890049);phosphorylation of RNA polymerase II C-terminal domain(1.55443845820606e-07);protein autophosphorylation(0.00553059148756651);regulation of MAP kinase activity(0.00198572752518753);RNA splicing(0.052384942992678)                                                                                                                                                                                                                                                                                                                                                                                                                                                                                                                                                                                                                                                                                                                                                                                                                                                                                                                                                                                                                                                                                                                                                                                                                                                                                                                                                                                                                                                                                                                                                                                                                                                                                                                                                                                                                                                                                                                                                                                                                                                                                                                                                                                                                                                                                                                                                                                                                                                                                                                                                                                                                                                                                                                                                                                                                                                                                                                                                                                                                                                                                                                                                                                                                                                                            | nucleus                                                                         | IP-LC-MS/MS              |

|        |         |                                                                                   |                                                                           |             |                                                                                                                                                                                                                                                                                                                                                                                                                                                                                                                                                                                                                                                                                                                                                                                                                                                                                                                                                                                                                                                                                                                                                                                                                                                                                                                                                                                                                                                                                                                                                                                                                                          |                                                                              |                     |
|--------|---------|-----------------------------------------------------------------------------------|---------------------------------------------------------------------------|-------------|------------------------------------------------------------------------------------------------------------------------------------------------------------------------------------------------------------------------------------------------------------------------------------------------------------------------------------------------------------------------------------------------------------------------------------------------------------------------------------------------------------------------------------------------------------------------------------------------------------------------------------------------------------------------------------------------------------------------------------------------------------------------------------------------------------------------------------------------------------------------------------------------------------------------------------------------------------------------------------------------------------------------------------------------------------------------------------------------------------------------------------------------------------------------------------------------------------------------------------------------------------------------------------------------------------------------------------------------------------------------------------------------------------------------------------------------------------------------------------------------------------------------------------------------------------------------------------------------------------------------------------------|------------------------------------------------------------------------------|---------------------|
| Q14004 | CDK13   | Cyclin-dependent kinase 13                                                        | phosphorylation of RNA polymerase II C-terminal domain                    | 1,55E-07    | alternative mRNA splicing, via spliceosome(0.00514677187861983);cell cycle(0.00072258391376332);hemopoiesis(0.0415637892109395);phosphorylation of RNA polymerase II C-terminal domain(1.55443845820606e-07);positive regulation of cell proliferation(0.0244588556691904);regulation of mitosis(5.40396186519786e-05);modulation by virus of host morphology or physiology(0.129144645146173)                                                                                                                                                                                                                                                                                                                                                                                                                                                                                                                                                                                                                                                                                                                                                                                                                                                                                                                                                                                                                                                                                                                                                                                                                                           | nucleus                                                                      | IP-LC-MS/MS         |
| P61769 | B2M     | Beta-2-microglobulin                                                              | regulation of defense response to virus by virus                          | 1,94E-07    | antigen processing and presentation of exogenous peptide antigen via MHC class I, TAP-dependent(0.0011491052785394);antigen processing and presentation of exogenous peptide antigen via MHC class I, TAP-independent(0.0221817395881307);antigen processing and presentation of exogenous protein antigen via MHC class Ib, TAP-dependent(0.001985727521518753);interferon-gamma-mediated signaling pathway(0.0484474237223889);positive regulation of T cell mediated cytotoxicity(0.00985131728675537);protein refolding(0.00554051119633074);regulation of defense response to virus by virus(1.93618738873914e-07);regulation of immune response(0.0462849647567519);response to cadmium ion(0.0218011092166748);response to drug(0.229842437886628);response to molecule of bacterial origin(0.0117984957519671);T cell differentiation in thymus(0.035315408718385);viral process(2.18153183719986e-05)                                                                                                                                                                                                                                                                                                                                                                                                                                                                                                                                                                                                                                                                                                                           | endosome;endoplasmic reticulum;plasma membrane;extracellular;golgi apparatus | Y2H                 |
| P51948 | MNAT1   | CDK-activating kinase assembly factor MAT1                                        | G2/M transition of mitotic cell cycle                                     | 2,22E-07    | 7-methylguanosine mRNA capping(0.0125752257676977);adult heart development(0.0133507342602218);apoptotic process(2.55992401287653e-05);cell proliferation(0.0149821972259697);G1 phase of mitotic cell cycle(0.000119490098783552);G1/S transition of mitotic cell cycle(0.00226378704275956);G2/M transition of mitotic cell cycle(2.22012761453102e-07);multicellular organismal metabolic process(0.00238194179822328);negative regulation of apoptotic process(0.000648052387978584);nucleotide-excision repair, DNA damage removal(0.00828805647114202);positive regulation of smooth muscle cell proliferation(0.0316001243941674);positive regulation of transcription from RNA polymerase II promoter(0.0927501700886529);positive regulation of viral transcription(0.0172100031534075);protein complex assembly(0.0566408305012186);protein phosphorylation(0.0718967487859126);regulation of cyclin-dependent protein serine/threonine kinase activity(0.0488068215511484);response to calcium ion(0.0382663905687807);S phase of mitotic cell cycle(0.00113115411855978);termination of RNA polymerase I transcription(0.00828805647114202);transcription elongation from RNA polymerase I promoter(0.00750458282164871);transcription elongation from RNA polymerase II promoter(0.028605443441922);transcription initiation from RNA polymerase I promoter(0.00985131728675537);transcription initiation from RNA polymerase II promoter(0.00378158476124163);transcription-coupled nucleotide-excision repair(0.0191282539288057);ventricular system development(0.00514677187861983);viral process(2.18153183719986e-05) | cytoplasm                                                                    | Y2H                 |
| Q92878 | RAD50   | DNA repair protein RAD50                                                          | positive regulation of kinase activity                                    | 1,55E-06    | DNA duplex unwinding(0.0198934362348523);double-strand break repair via homologous recombination(0.0297313675389651);nucleic acid phosphodiester bond hydrolysis(0.056287745319328);positive regulation of kinase activity(1.55264927967749e-06);positive regulation of protein autophosphorylation(0.00514677187861983);reciprocal meiotic recombination(0.014511709725624);regulation of mitotic recombination(0.00079522295738861);telomere maintenance via telomerase(0.00435836682781625)                                                                                                                                                                                                                                                                                                                                                                                                                                                                                                                                                                                                                                                                                                                                                                                                                                                                                                                                                                                                                                                                                                                                           | nucleus                                                                      | IP-LC-MS/MS         |
| Q969S3 | ZNF622  | Zinc finger protein 622                                                           | positive regulation of kinase activity                                    | 1,55E-06    | intrinsic apoptotic signaling pathway in response to oxidative stress(0.00750458282164871);positive regulation of apoptotic process(0.000452048250651337);positive regulation of JNK cascade(0.000550113489024593);positive regulation of kinase activity(1.55264927967749e-06)                                                                                                                                                                                                                                                                                                                                                                                                                                                                                                                                                                                                                                                                                                                                                                                                                                                                                                                                                                                                                                                                                                                                                                                                                                                                                                                                                          | golgi apparatus;nucleus                                                      | IP-LC-MS/MS         |
| P62701 | RPS4X   | 40S ribosomal protein S4, X isoform                                               | viral transcription                                                       | 5,13E-06    | multicellular organismal development(0.221601652248025);nuclear-transcribed mRNA catabolic process, nonsense-mediated decay(1.52489109676196e-05);positive regulation of cell proliferation(0.0244588556691904);positive regulation of translation(0.0221817395881307);SRP-dependent cotranslational protein targeting to membrane(2.22649669967908e-05);translational elongation(1.01608240187251e-05);translational initiation(1.13865950608156e-05);translational termination(5.31891407422798e-06);viral transcription(5.12859789334388e-06)                                                                                                                                                                                                                                                                                                                                                                                                                                                                                                                                                                                                                                                                                                                                                                                                                                                                                                                                                                                                                                                                                         | cytosol                                                                      | IP-LC-MS/MS and Y2H |
| P62753 | RPS6    | 40S ribosomal protein S6                                                          | viral transcription                                                       | 5,13E-06    | glucose homeostasis(0.0530971252543661);insulin receptor signaling pathway(0.0773102795637299);nuclear-transcribed mRNA catabolic process, nonsense-mediated decay(1.52489109676196e-05);positive regulation of apoptotic process(0.000452048250651337);ribosomal small subunit assembly(0.00356872536940053);ribosomal small subunit biogenesis(0.00277784607759494);rRNA processing(0.0480877370312025);SRP-dependent cotranslational protein targeting to membrane(2.22649669967908e-05);TOR signaling cascade(0.00554051119633074);translational elongation(1.01608240187251e-05);translational initiation(1.13865950608156e-05);translational termination(5.31891407422798e-06);viral transcription(5.12859789334388e-06)                                                                                                                                                                                                                                                                                                                                                                                                                                                                                                                                                                                                                                                                                                                                                                                                                                                                                                           | cytosol;nucleus                                                              | IP-LC-MS/MS and Y2H |
| P28331 | NDUFS1  | NADH-ubiquinone oxidoreductase 75 kDa subunit, mitochondrial                      | apoptotic process                                                         | 2,56E-05    | apoptotic process(2.55992401287653e-05);ATP metabolic process(0.014511709725624);mitochondrial electron transport, NADH to ubiquinone(0.215211662167688);reactive oxygen species metabolic process(0.0137380308757676);regulation of mitochondrial membrane potential(0.0133507342602218)                                                                                                                                                                                                                                                                                                                                                                                                                                                                                                                                                                                                                                                                                                                                                                                                                                                                                                                                                                                                                                                                                                                                                                                                                                                                                                                                                | mitochondrion                                                                | Y2H                 |
| P69905 | HBA1    | Hemoglobin subunit alpha                                                          | positive regulation of cell death                                         | 6,25E-05    | bicarbonate transport(0.000296553918214628);hydrogen peroxide catabolic process(7.14810798681335e-05);oxygen transport(0.00435836682781625);positive regulation of cell death(6.24593832389618e-05);protein heterooligomerization(0.00145447178972716);small molecule metabolic process(8.53030688034272e-05)                                                                                                                                                                                                                                                                                                                                                                                                                                                                                                                                                                                                                                                                                                                                                                                                                                                                                                                                                                                                                                                                                                                                                                                                                                                                                                                            | cytosol                                                                      | Y2H                 |
| P68871 | HBB     | Hemoglobin subunit beta                                                           | positive regulation of cell death                                         | 6,25E-05    | bicarbonate transport(0.000296553918214628);blood coagulation(0.000380021218663613);hydrogen peroxide catabolic process(7.14810798681335e-05);nitric oxide transport(0.00079522295738861);positive regulation of cell death(6.24593832389618e-05);positive regulation of nitric oxide biosynthetic process(0.0214201776692546);protein heterooligomerization(0.00145447178972716);regulation of blood pressure(0.0386339403190874);regulation of blood vessel size(0.00985131728675537);renal absorption(0.00119236828353075);small molecule metabolic process(8.53030688034272e-05)                                                                                                                                                                                                                                                                                                                                                                                                                                                                                                                                                                                                                                                                                                                                                                                                                                                                                                                                                                                                                                                     | cytosol                                                                      | Y2H                 |
| P13196 | ALAS1   | 5-aminolevulinatase, nonspecific, mitochondrial                                   | small molecule metabolic process                                          | 8,53E-05    | cellular lipid metabolic process(0.0274790386490435);heme biosynthetic process(0.0175942591521723);protoporphyrinogen IX biosynthetic process(0.00396370073863742);small molecule metabolic process(8.53030688034272e-05)                                                                                                                                                                                                                                                                                                                                                                                                                                                                                                                                                                                                                                                                                                                                                                                                                                                                                                                                                                                                                                                                                                                                                                                                                                                                                                                                                                                                                | mitochondrion;nucleus                                                        | Y2H                 |
| Q9UDW1 | UQCRI10 | Cytochrome b-c1 complex subunit 9 Coiled-coil and C2 domain-containing protein 1A | small molecule metabolic process                                          | 8,53E-05    | mitochondrial electron transport, ubiquinol to cytochrome c(0.00554051119633074);small molecule metabolic process(8.53030688034272e-05)                                                                                                                                                                                                                                                                                                                                                                                                                                                                                                                                                                                                                                                                                                                                                                                                                                                                                                                                                                                                                                                                                                                                                                                                                                                                                                                                                                                                                                                                                                  | mitochondrion cytoplasm;microtubule organising centre;nucleus                | Y2H                 |
| Q6P1N0 | CC2D1A  |                                                                                   | positive regulation of I-kappaB kinase/NF-kappaB kinase/NF-kappaB cascade | 0,000104124 | positive regulation of I-kappaB kinase/NF-kappaB cascade(0.00010412416778128)                                                                                                                                                                                                                                                                                                                                                                                                                                                                                                                                                                                                                                                                                                                                                                                                                                                                                                                                                                                                                                                                                                                                                                                                                                                                                                                                                                                                                                                                                                                                                            |                                                                              | Y2H                 |

|        |          |                                                                                            |                                                                                                         |             |             |                                                                                                                                                                                                                                                                                                                                                                                                                                                                                                                                                                                                                                                                                                                                                                                                                                                                                                                                                                                                                                                                                                                                                                                                                                                                                                   |                                                      |                        |
|--------|----------|--------------------------------------------------------------------------------------------|---------------------------------------------------------------------------------------------------------|-------------|-------------|---------------------------------------------------------------------------------------------------------------------------------------------------------------------------------------------------------------------------------------------------------------------------------------------------------------------------------------------------------------------------------------------------------------------------------------------------------------------------------------------------------------------------------------------------------------------------------------------------------------------------------------------------------------------------------------------------------------------------------------------------------------------------------------------------------------------------------------------------------------------------------------------------------------------------------------------------------------------------------------------------------------------------------------------------------------------------------------------------------------------------------------------------------------------------------------------------------------------------------------------------------------------------------------------------|------------------------------------------------------|------------------------|
| Q6FHJ7 | SFRP4    | Secreted frizzled-related protein 4 A1Pase family AAA domain-containing protein 3A         | negative regulation of sodium-dependent phosphate transport<br>negative regulation of apoptotic process | 0,000397767 | 0,000648052 | brain development(0.110501482347968);cell differentiation(0.174175540579659);decidualization(0.0102413655062746);embryo development(0.0776462790738453);epithelium development(0.00238194179822328);gonad development(0.0110205428022322);mammary gland involution(0.00356872536940053);menstrual cycle phase(0.0015892030798619);negative regulation of canonical Wnt receptor signaling pathway(0.0520284308747686);negative regulation of cell proliferation(0.208638489973648);negative regulation of JNK cascade(0.0125752257676977);negative regulation of sequence-specific DNA binding transcription factor activity(0.0289817832346469);negative regulation of sodium-dependent phosphate transport(0.000397766922540126);phosphate ion homeostasis(0.00435836682781625);positive regulation of apoptotic process(0.000452048250651337);positive regulation of canonical Wnt receptor signaling pathway(0.0304797616903373);positive regulation of epidermal cell differentiation(0.000397766922540126);positive regulation of gene expression(0.00295023504379598);positive regulation of receptor internalization(0.00671987845333802);response to hormone stimulus(0.0259715168833515);vasculature development(0.00828805647114202);Wnt receptor signaling pathway(0.109264889579327) | cytoplasm;extracellular;nucl<br>eus                  | Y2H                    |
| Q9NV17 | ATAD3A   |                                                                                            |                                                                                                         | 0,000648052 |             | cell growth(0.0441120704062429);negative regulation of apoptotic process(0.000648052387978584)                                                                                                                                                                                                                                                                                                                                                                                                                                                                                                                                                                                                                                                                                                                                                                                                                                                                                                                                                                                                                                                                                                                                                                                                    | mitochondrion                                        | IP-LC-MS/MS            |
| P41220 | RGS2     | Regulator of G-protein signaling 2 Pleckstrin homology domain-containing family A member 8 | cell cycle<br>ER to Golgi ceramide transport                                                            | 0,000722584 |             | brown fat cell differentiation(0.0267258756052151);cell cycle(0.00072258391376332);negative regulation of cardiac muscle hypertrophy(0.00238194179822328);negative regulation of G-protein coupled receptor protein signaling pathway(0.00671987845333802);negative regulation of MAP kinase activity(0.0198934362348523);negative regulation of phospholipase activity(0.0015892030798619);positive regulation of cardiac muscle contraction(0.00317344054183859);regulation of adrenergic receptor signaling pathway(0.00079522295738861);regulation of translation(0.0259715168833515);relaxation of cardiac muscle(0.00514677187861983);relaxation of vascular smooth muscle(0.00435836682781625);spermatogenesis(0.171372063324065);termination of G-protein coupled receptor signaling pathway(0.0566408305012186)                                                                                                                                                                                                                                                                                                                                                                                                                                                                          | cytosol;plasma<br>membrane;mitochondrion;nu<br>cleus | Y2H                    |
| Q96JA3 | PLEKHA8  |                                                                                            | small GTPase mediated signal transduction                                                               | 0,000795223 |             | ER to Golgi ceramide transport(0.00079522295738861);glycolipid transport(0.00514677187861983);protein transport(0.00222028449423476)                                                                                                                                                                                                                                                                                                                                                                                                                                                                                                                                                                                                                                                                                                                                                                                                                                                                                                                                                                                                                                                                                                                                                              | golgi apparatus                                      | Y2H                    |
| Q8N110 | DOCK4    | Dedicator of cytokinesis protein 4                                                         | signal transduction                                                                                     | 0,000947141 |             | cell chemotaxis(0.00985131728675537);small GTPase mediated signal transduction(0.000947140854281652)                                                                                                                                                                                                                                                                                                                                                                                                                                                                                                                                                                                                                                                                                                                                                                                                                                                                                                                                                                                                                                                                                                                                                                                              | cytosol                                              | IP-LC-MS/MS            |
| Q13637 | RAB32    | Ras-related protein Rab-32                                                                 | signal transduction                                                                                     | 0,000947141 |             | phagosome maturation(0.014511709725624);protein transport(0.00222028449423476);small GTPase mediated signal transduction(0.000947140854281652)                                                                                                                                                                                                                                                                                                                                                                                                                                                                                                                                                                                                                                                                                                                                                                                                                                                                                                                                                                                                                                                                                                                                                    | mitochondrion                                        | IP-LC-MS/MS            |
| Q9UBX3 | SLC25A10 | Mitochondrial dicarboxylate carrier                                                        | sulfide oxidation, using sulfide:quinone oxidoreductase                                                 | 0,001985728 |             | cellular nitrogen compound metabolic process(0.0316001243941674);gluconeogenesis(0.0323455491879884);mitochondrial transport(0.0125752257676977);sulfide oxidation, using sulfide:quinone oxidoreductase(0.00198572752518753);sulfur amino acid catabolic process(0.00317344054183859)                                                                                                                                                                                                                                                                                                                                                                                                                                                                                                                                                                                                                                                                                                                                                                                                                                                                                                                                                                                                            | mitochondrion;nucleus                                | IP-LC-MS/MS            |
| Q14444 | CAPRN1   | Caprin-1                                                                                   | positive regulation of dendritic spine morphogenesis                                                    | 0,005146772 |             | negative regulation of translation(0.0168254438826213);positive regulation of dendrite morphogenesis(0.0117984957519671);positive regulation of dendritic spine morphogenesis(0.00514677187861983)                                                                                                                                                                                                                                                                                                                                                                                                                                                                                                                                                                                                                                                                                                                                                                                                                                                                                                                                                                                                                                                                                                | cytoplasm;cytosol;plasma<br>membrane                 | IP-LC-MS/MS            |
| O95831 | AIFM1    | Apoptosis-inducing factor 1, mitochondrial                                                 | mitochondrial respiratory chain complex I assembly                                                      | 0,006327064 |             | activation of cysteine-type endopeptidase activity involved in apoptotic process(0.0342039283272441);apoptotic DNA fragmentation(0.0141250226389181);cell redox homeostasis(0.0882539107748017);intrinsic apoptotic signaling pathway in response to endoplasmic reticulum stress(0.0164405811645699);mitochondrial respiratory chain complex I assembly(0.00632706430591511);neuron apoptotic process(0.0338328441383591);neuron differentiation(0.0327178169977812)                                                                                                                                                                                                                                                                                                                                                                                                                                                                                                                                                                                                                                                                                                                                                                                                                             | cytosol;mitochondrion;nucl<br>eus;cytoplasm          | IP-LC-MS/MS            |
| P68104 | EEF1A1   | Elongation factor 1-alpha 1                                                                | GTP catabolic process                                                                                   | 0,006613914 |             | GTP catabolic process(0.00661391418924925);regulation of transcription, DNA-dependent(0.370743827761495);transcription, DNA-dependent(0.371144387841689)                                                                                                                                                                                                                                                                                                                                                                                                                                                                                                                                                                                                                                                                                                                                                                                                                                                                                                                                                                                                                                                                                                                                          | cytosol;cytoplasm;nucleus                            | IP-LC-MS/MS and<br>Y2H |
| P49411 | TUFM     | Elongation factor Tu, mitochondrial                                                        | GTP catabolic process                                                                                   | 0,006613914 |             | GTP catabolic process(0.00661391418924925)                                                                                                                                                                                                                                                                                                                                                                                                                                                                                                                                                                                                                                                                                                                                                                                                                                                                                                                                                                                                                                                                                                                                                                                                                                                        | mitochondrion                                        | IP-LC-MS/MS and<br>Y2H |
| Q9UMS0 | NFU1     | NFU1 iron-sulfur cluster scaffold homolog, mitochondrial                                   | iron-sulfur cluster assembly                                                                            | 0,009460962 |             | iron-sulfur cluster assembly(0.00946096245045438)                                                                                                                                                                                                                                                                                                                                                                                                                                                                                                                                                                                                                                                                                                                                                                                                                                                                                                                                                                                                                                                                                                                                                                                                                                                 | mitochondrion;cytosol;mitochon<br>drion;nucleus      | Y2H                    |
| Q9BVA1 | TUBB2B   | Tubulin beta-2B chain                                                                      | posttranslational protein folding                                                                       | 0,015284171 |             | _de novo_ posttranslational protein folding(0.0152841705730629);microtubule-based process(0.0625998053367013);neuron migration(0.0921602276650665);protein polymerization(0.0701904671294709)                                                                                                                                                                                                                                                                                                                                                                                                                                                                                                                                                                                                                                                                                                                                                                                                                                                                                                                                                                                                                                                                                                     | cytoplasm;plasma membrane                            | Y2H                    |
| Q96P70 | IPO9     | Importin-9                                                                                 | protein import into nucleus                                                                             | 0,032717817 |             | protein import into nucleus(0.0327178169977812)                                                                                                                                                                                                                                                                                                                                                                                                                                                                                                                                                                                                                                                                                                                                                                                                                                                                                                                                                                                                                                                                                                                                                                                                                                                   | cytoplasm;nucleus                                    | IP-LC-MS/MS            |
| Q7Z6G8 | ANKS1B   | Ankyrin repeat and sterle alpha motif domain-containing protein 1B                         | NOT DEFINED                                                                                             |             |             | NOT DEFINED                                                                                                                                                                                                                                                                                                                                                                                                                                                                                                                                                                                                                                                                                                                                                                                                                                                                                                                                                                                                                                                                                                                                                                                                                                                                                       | cytoplasm;plasma membrane                            | Y2H                    |
| Q5SW79 | CEP170   | Centrosomal protein of 170 kDa                                                             | NOT DEFINED                                                                                             |             |             | NOT DEFINED                                                                                                                                                                                                                                                                                                                                                                                                                                                                                                                                                                                                                                                                                                                                                                                                                                                                                                                                                                                                                                                                                                                                                                                                                                                                                       | centrosome;cytoplasm                                 | IP-LC-MS/MS            |
| O94868 | FCHSD2   | FCH and double SH3 domains protein 2                                                       | NOT DEFINED                                                                                             |             |             | NOT DEFINED                                                                                                                                                                                                                                                                                                                                                                                                                                                                                                                                                                                                                                                                                                                                                                                                                                                                                                                                                                                                                                                                                                                                                                                                                                                                                       | NOT DEFINED                                          | Y2H                    |
| Q3KQU3 | MAP7D1   | MAP7 domain-containing protein 1                                                           | NOT DEFINED                                                                                             |             |             | NOT DEFINED                                                                                                                                                                                                                                                                                                                                                                                                                                                                                                                                                                                                                                                                                                                                                                                                                                                                                                                                                                                                                                                                                                                                                                                                                                                                                       | cytoplasm                                            | IP-LC-MS/MS and<br>Y2H |
| Q9HD45 | TM9SF3   | Transmembrane 9 superfamily member 3                                                       | NOT DEFINED                                                                                             |             |             | NOT DEFINED                                                                                                                                                                                                                                                                                                                                                                                                                                                                                                                                                                                                                                                                                                                                                                                                                                                                                                                                                                                                                                                                                                                                                                                                                                                                                       | NOT DEFINED                                          | Y2H                    |
| Q5T4D3 | TMTC4    | Transmembrane and TIRK repeat-containing protein 4                                         | NOT DEFINED                                                                                             |             |             | NOT DEFINED                                                                                                                                                                                                                                                                                                                                                                                                                                                                                                                                                                                                                                                                                                                                                                                                                                                                                                                                                                                                                                                                                                                                                                                                                                                                                       | NOT DEFINED                                          | Y2H                    |

IP-MS/MS: Immunoprecipitation/Mass spectrometry; YTH: Yeast two hybrid

**Supplementary Table S2. *In silico* analysis of protein interaction with NEK7 retrieved by the Yeast Two-Hybrid System Screens.** The sequences of NEK7 interacting proteins retrieved from Y2H were analyzed for the domain composition and presence of disordered amino acid residues.

| Gene    | Coded protein residues<br>(retrieved/complete<br>sequence) | Composition domains (Pfam, PROSITE or InterPro) <sup>1</sup>                                 | Regions of disorder (PONDR VL-XT) <sup>2</sup> |                                                                                                                                                     |
|---------|------------------------------------------------------------|----------------------------------------------------------------------------------------------|------------------------------------------------|-----------------------------------------------------------------------------------------------------------------------------------------------------|
|         |                                                            |                                                                                              | Percentage<br>of disordered resi<br>dues       | Segment disordered <sup>3</sup>                                                                                                                     |
| B2M     | 1-119/119                                                  | IG MHC; C1 set                                                                               | 19.33                                          | [1]-[3]; [24]-[30]; [57]-[68]; [119]-[119]                                                                                                          |
| NEK9    | 764-976/979                                                | FAMILY NOT NAMED                                                                             | 62.91                                          | [1]-[43]; [50]-[77]; [92]-[131]; [182]-[202]; [212]-[213]                                                                                           |
| RGS2    | 1-211/211                                                  | Regulator of G-protein signaling; RGS superfamily                                            | 22.75                                          | [1]-[5]; [17]-[39]; [55]-[65]; [125]-[129]; [206]-[207]; [210]-[211]                                                                                |
| MNAT1   | 1-309/309                                                  | Ubiquitin-interacting motif (UIM) repeat profile; CDK-activating kinase assembly factor MAT1 | 45.31                                          | [63]-[85]; [94]-[100]; [104]-[105]; [133]-[133]; [137]-[173]; [181]-[200]; [205]-[212]; [259]-[273]; [275]-[285]                                    |
| SFRP4   | 1-346/346                                                  | Fz domain; UNC-6/NTR/C345C module                                                            | 31.50                                          | [53]-[57]; [101]-[106]; [151]-[153]; [167]-[185]; 235-[239]; [276]-[346]                                                                            |
| UQCR10  | 1-63/63                                                    | UCR UQCRX QCR9                                                                               | 11.11                                          | [1]-[6]; [63]-[63]                                                                                                                                  |
| NDUFS1  | 451-727/727                                                | Molybdopterin; DUF1982                                                                       | 19.10                                          | [2]-[13]; [21]-[27]; [37]-[40]; [121]-[122]; [139]-[151]; [179]-[182]; [256]-[263]; [267]-[267]                                                     |
| ALAS1   | 94-640/640                                                 | AA TRANSFER CLASS 2; Aminotran 1 2; Preseq ALAS                                              | 23.40                                          | [1]-[12]; [31]-[66]; [88]-[93]; [119]-[127]; [243]-[250]; [279]-[279]; [283]-[284]; [336]-[336]; [394]-[418]; [445]-[451]; [464]-[483]; [545]-[545] |
| NFU1    | 22-208/254                                                 | Nfu N                                                                                        | 13.10                                          | [127]-[145]                                                                                                                                         |
| TUBBB2B | 247-430/445                                                | Tubulin C-terminal domain                                                                    | 15.76                                          | [1]-[3]; [33]-[39]; [76]-[83]; [160]-[170]                                                                                                          |
| HBA1    | 1-142/142                                                  | Globin                                                                                       | 7.04                                           | [1]-[10]                                                                                                                                            |
| HBB     | 1-147/147                                                  | Globin                                                                                       | 5.44                                           | [2]-[9]                                                                                                                                             |
| EEF1A1  | 340-432/462                                                | GTP EFTU D3                                                                                  | 39.02                                          | [35]-[54]; [96]-[123]                                                                                                                               |
| TUFM    | 13-455/455                                                 | GTP-binding elongation factor family, EF-Tu/EF-1A subfamily                                  | 36.12                                          | [1]-[4]; [88]-[101]; [153]-[157]; [179]-[200]; [208]-[226]; [247]-[254]; [258]-[280]; [299]-[336]; [384]-[399]; [428]-[431]; [436]-[442]            |
| PLEKHA8 | 103-418/459                                                | Glycolipid transfer protein                                                                  | 45.25                                          | [1]-[12]; [36]-[48]; [75]-[80]; [82]-[100]; [109]-[130]; [151]-[198]; [218]-[230]; [286]-[295]                                                      |
| ACTG1   | 187-375/375                                                | Actin                                                                                        | 25.93                                          | [16]-[22]; [42]-[63]; [116]-[131]; [178]-[181]                                                                                                      |
| RPS6    | 1-228/249                                                  | Ribosomal protein S6e                                                                        | 64.47                                          | [18]-[33]; [78]-[100]; [121]-[228]                                                                                                                  |
| CC2D1A  | 501-940/951                                                | C2 domain                                                                                    | 38.64                                          | [1]-[3]; [5]-[47]; [68]-[81]; [221]-[229]; [259]-[275]; [287]-[299]; [305]-[305]; [313]-[343]; [360]-[382]; [401]-[401]; [426]-[440]                |
| RPS4X   | 5-263/263                                                  | S4 domain; KOW motif; Ribosomal family S4e                                                   | 15.83                                          | [1]-[2]; [5]-[6]; [8]-[9]; [63]-[67]; [230]-[259]                                                                                                   |
| RPS27A  | 1-156/156                                                  | Ubiquitin; Ribosomal S27; UBIQUITIN 1                                                        | 51.92                                          | [17]-[43]; [69]-[120]; [155]-[156]                                                                                                                  |
| ANKS1B  | 6-426/426                                                  | Sterile alpha motif; Phosphotyrosine interaction domain                                      | 29.58                                          | [1]-[3]; [162]-[204]; [237]-[254]; [290]-[297]; [369]-[409]                                                                                         |
| FCHSD2  | 627-740/740                                                | FAMILY NOT NAMED                                                                             | 94.74                                          | [1]-[108]                                                                                                                                           |
| MAP7D1  | 715-841/841                                                | E-MAP-115 (FAMILY NOT NAMED)                                                                 | 85.83                                          | [1]-[75]; [81]-[107]; [119]-[125]                                                                                                                   |
| TMTC4   | 467-741/741                                                | TPR 1; TPR 2                                                                                 | 21.45                                          | [1]-[4]; [59]-[77]; [102]-[109]; [169]-[184]; [256]-[267]                                                                                           |
| TM9SF3  | 398-589/589                                                | EMP70                                                                                        | 0.00                                           | No found                                                                                                                                            |

<sup>1</sup>Domain composition of the recovered sequences obtained by Pfam, PROSITE or InterPro databases (other domains may be present). <sup>2</sup>Using a scanning of 28 amino acid residues as a parameter analysis. If a residue value exceeds a threshold of 0.5 the residue is considered disordered. <sup>3</sup>Disordered segments represented in amino acid residues.

**Supplementary Table S3. Proposed cellular localization and colocalization of NEK7 with its interacting partners throughout the cell cycle.** Endogenous proteins were accessed by immunofluorescence and their localization in the main structures through the cell cycle is described in the table.

|                     | Protein/Cellular component              |                                                                      |                                              |                |            |                             |                |                                           |                                           |                                        |                             |            |
|---------------------|-----------------------------------------|----------------------------------------------------------------------|----------------------------------------------|----------------|------------|-----------------------------|----------------|-------------------------------------------|-------------------------------------------|----------------------------------------|-----------------------------|------------|
|                     | NEK7                                    | RGS2                                                                 | RPS6                                         | CC2D1A         | PLEKHA8    | ANKS1B                      | ACTG1          | TUBB                                      | NEK9                                      | MNAT1                                  | TMTC4                       |            |
| <b>Interphase</b>   | cytoplasm, DNA                          | cytoplasm, centrosome, presumed microtubule-organising center (MTOC) | cytoplasm, DNA                               | cytoplasm, DNA | cytoplasm  | cytoplasm, DNA              | cytoplasm, DNA | cytoplasm, centrosome                     | cytoplasm, DNA                            | cytoplasm, DNA                         | cytoplasm, DNA              |            |
| <b>Prophase</b>     | cytoplasm, DNA                          | DNA                                                                  | cytoplasm, DNA                               | cytoplasm      | cytoplasm  | unobserved                  | cytoplasm, DNA | mitotic spindle, spindle pole, centrosome | cytoplasm, centrosome                     | cytoplasm, centrosome                  | DNA                         |            |
| <b>Prometaphase</b> | cytoplasm, centrosome                   | cytoplasm, mitotic spindle, spindle pole, centrosome                 | cytoplasm, DNA                               | cytoplasm      | cytoplasm  | DNA                         | cytoplasm, DNA | DNA                                       | cytoplasm, centrosome                     | cytoplasm, spindle pole, centrosome    | unobserved                  |            |
| <b>Mitosis</b>      | <b>Metaphase</b>                        | cytoplasm, mitotic spindle, spindle pole                             | mitotic spindle, spindle pole                | DNA            | unobserved | cytoplasm                   | unobserved     | unobserved                                | mitotic spindle, spindle pole, centrosome | cytoplasm, spindle pole, centrosome    | unobserved                  | unobserved |
|                     | <b>Anaphase</b>                         | cytoplasm, spindle midzone                                           | mitotic spindle, spindle midzone, centrosome | unobserved     | unobserved | cytoplasm                   | unobserved     | unobserved                                | mitotic spindle, spindle pole,            | cytoplasm, spindle midzone, centrosome | cytoplasm                   | unobserved |
|                     | <b>Telophase</b>                        | cytoplasm, DNA                                                       | unobserved                                   | DNA            | unobserved | cytoplasm/ contractile ring | unobserved     | unobserved                                | cytoplasm/ contractile ring               | cytoplasm, centrosome                  | cytoplasm, contractile ring | unobserved |
| <b>Cytokinesis</b>  | cytoplasm, cytoplasmic bridge, midbody? | cytoplasm, centrosome, cytoplasmic bridge, midbody?                  | unobserved                                   | unobserved     | cytoplasm  | unobserved                  | unobserved     | cytoplasm, cytoplasmic bridge, midbody?   | cytoplasm, cytoplasmic bridge             | absent                                 | unobserved                  |            |
